# Supplementary material for: MITOL-dependent ubiquitylation negatively regulates the entry of PolγA into mitochondria
Source: PLOS journal article supplement (doi:10.1371/journal.pbio.3001139), 2021-03-03

Figure 1

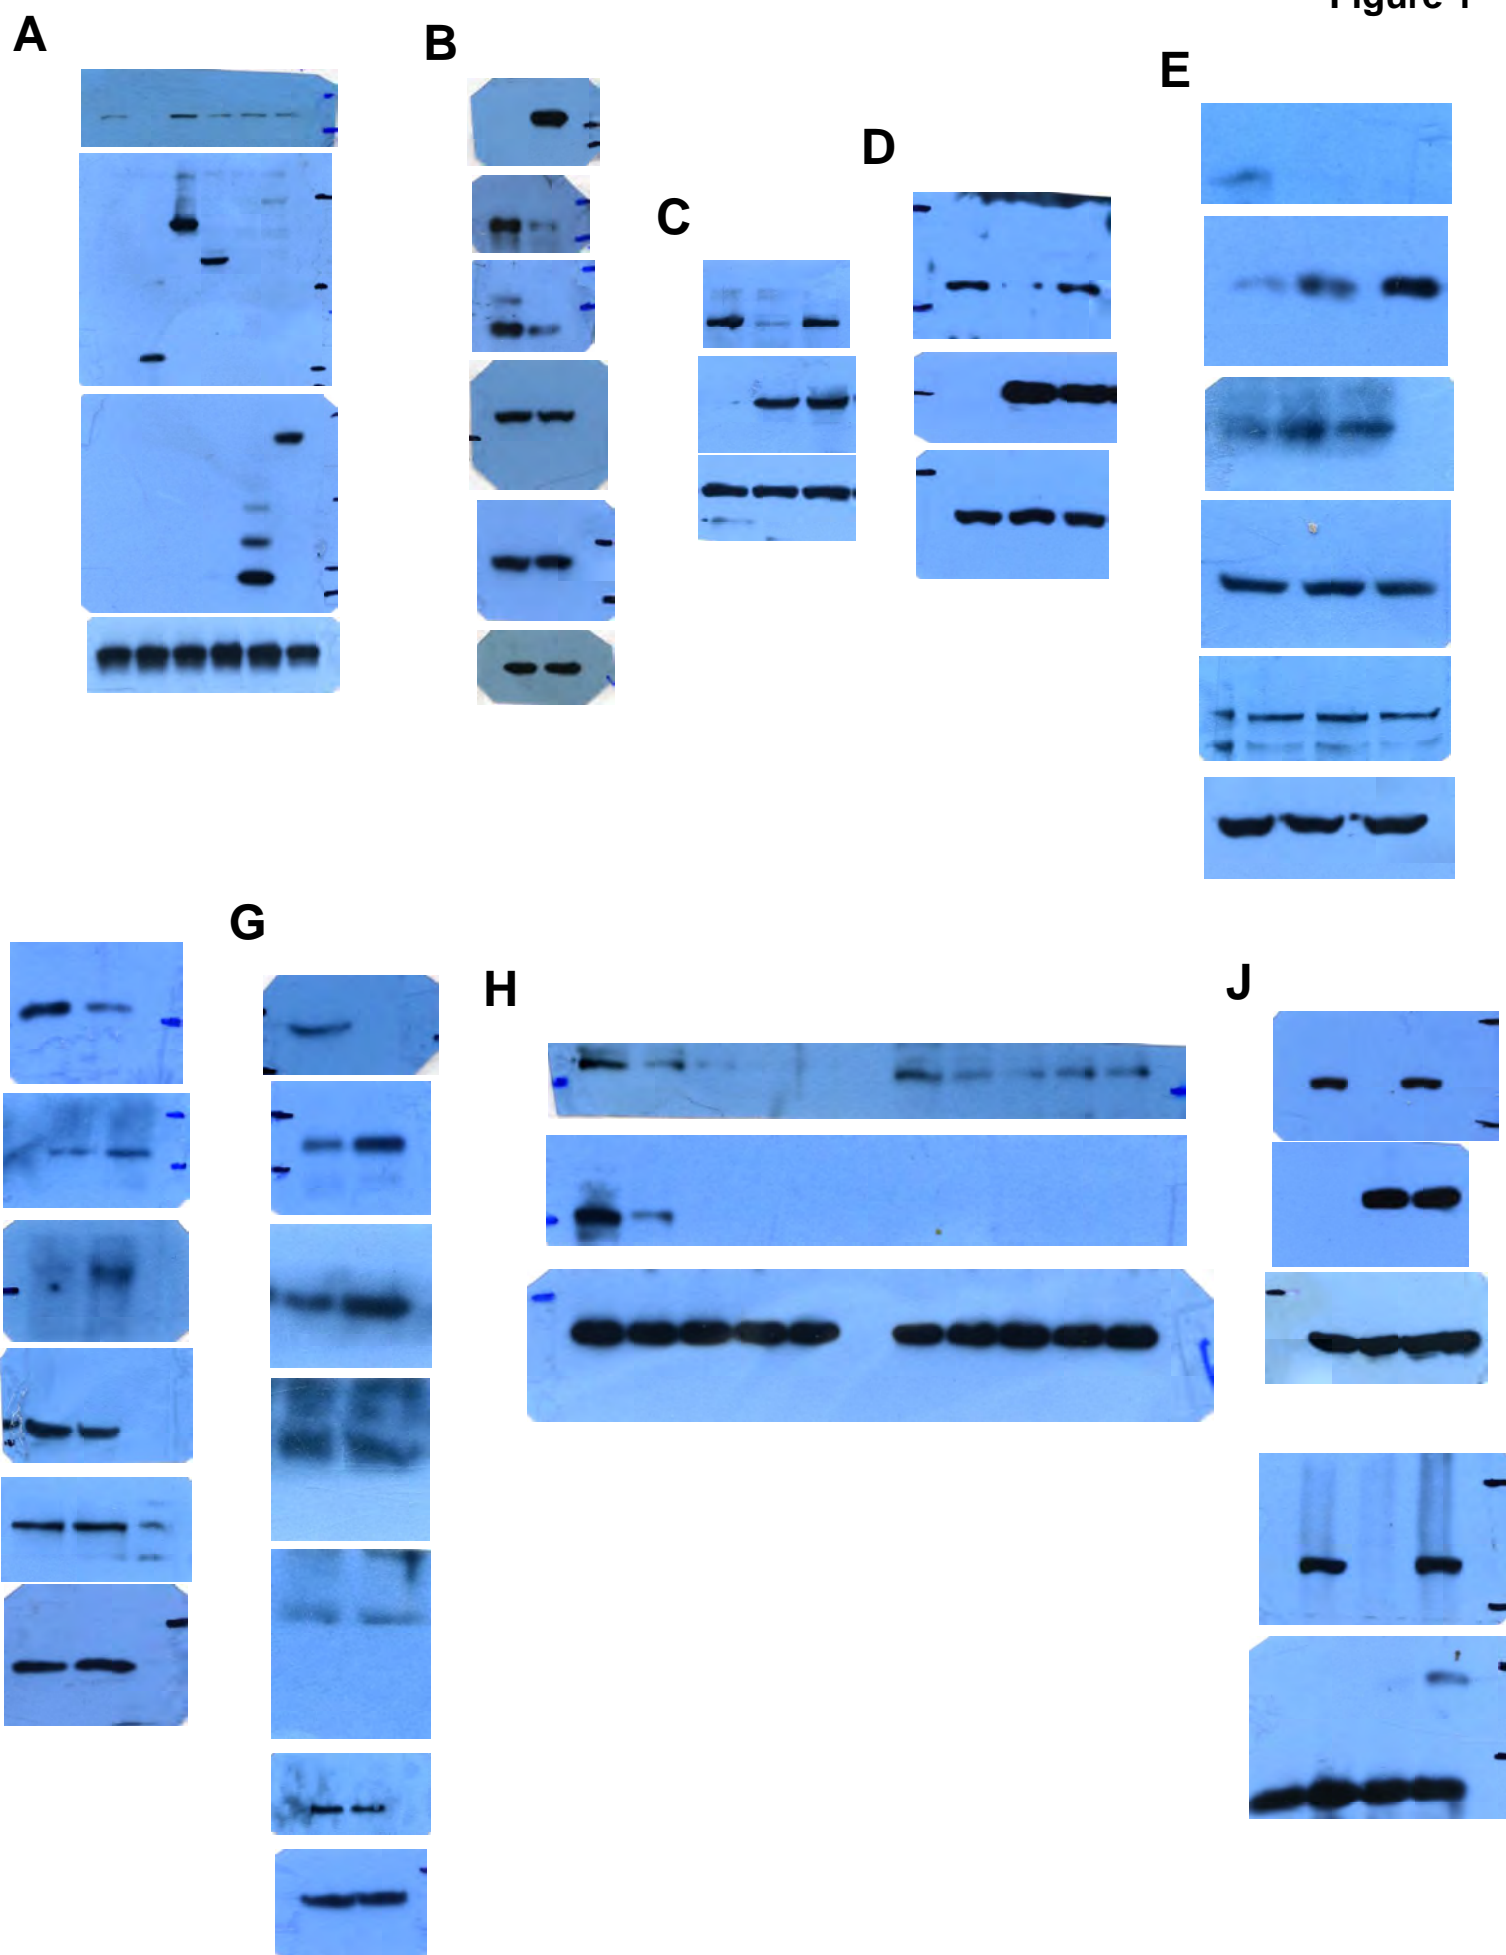

Figure 2

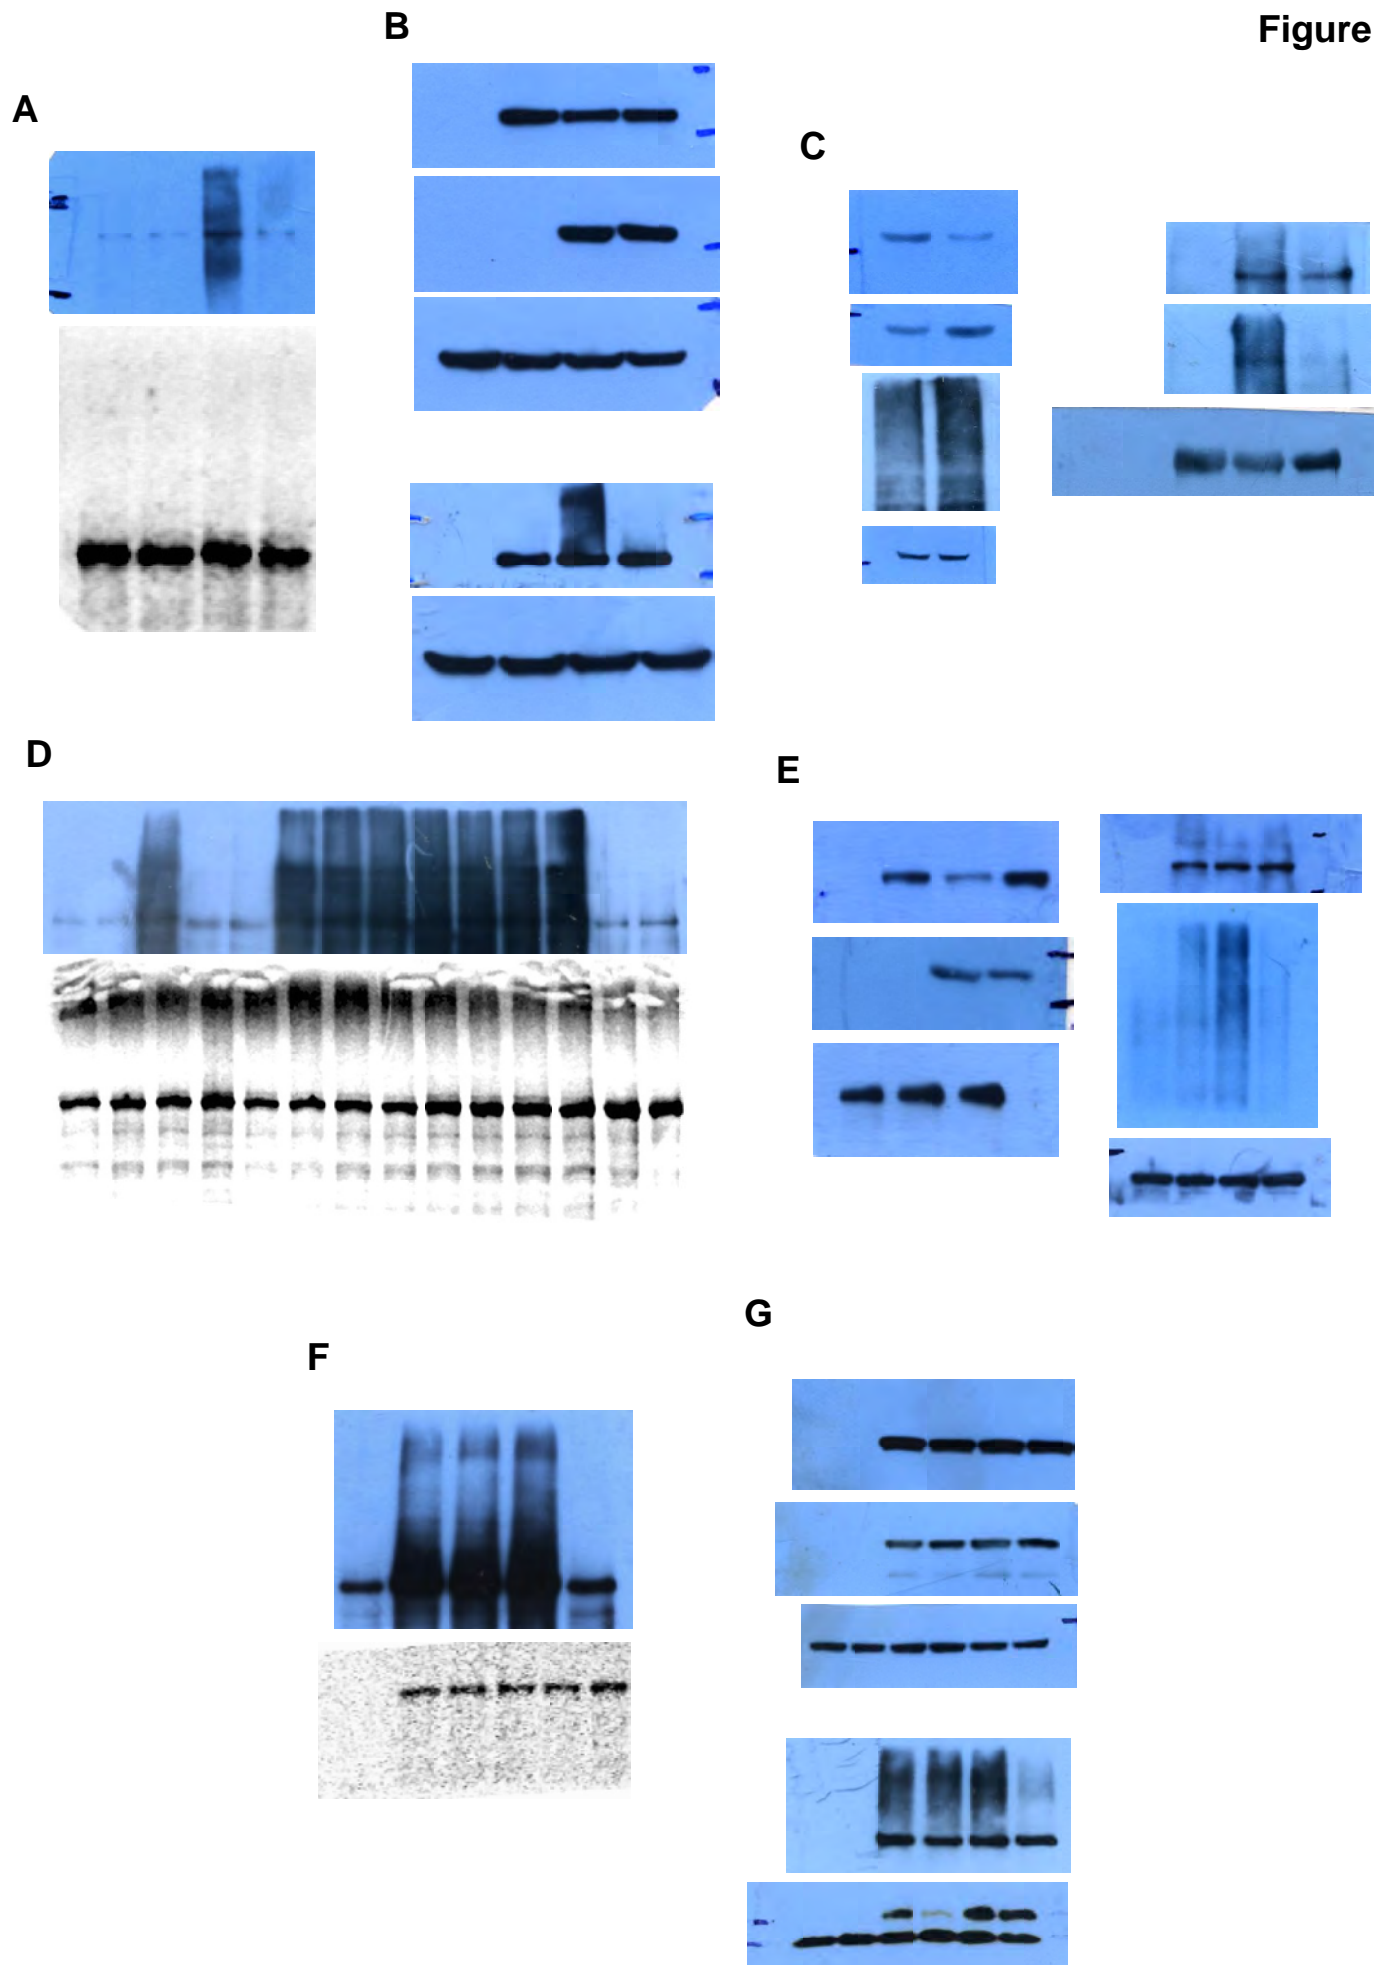

Figure 3

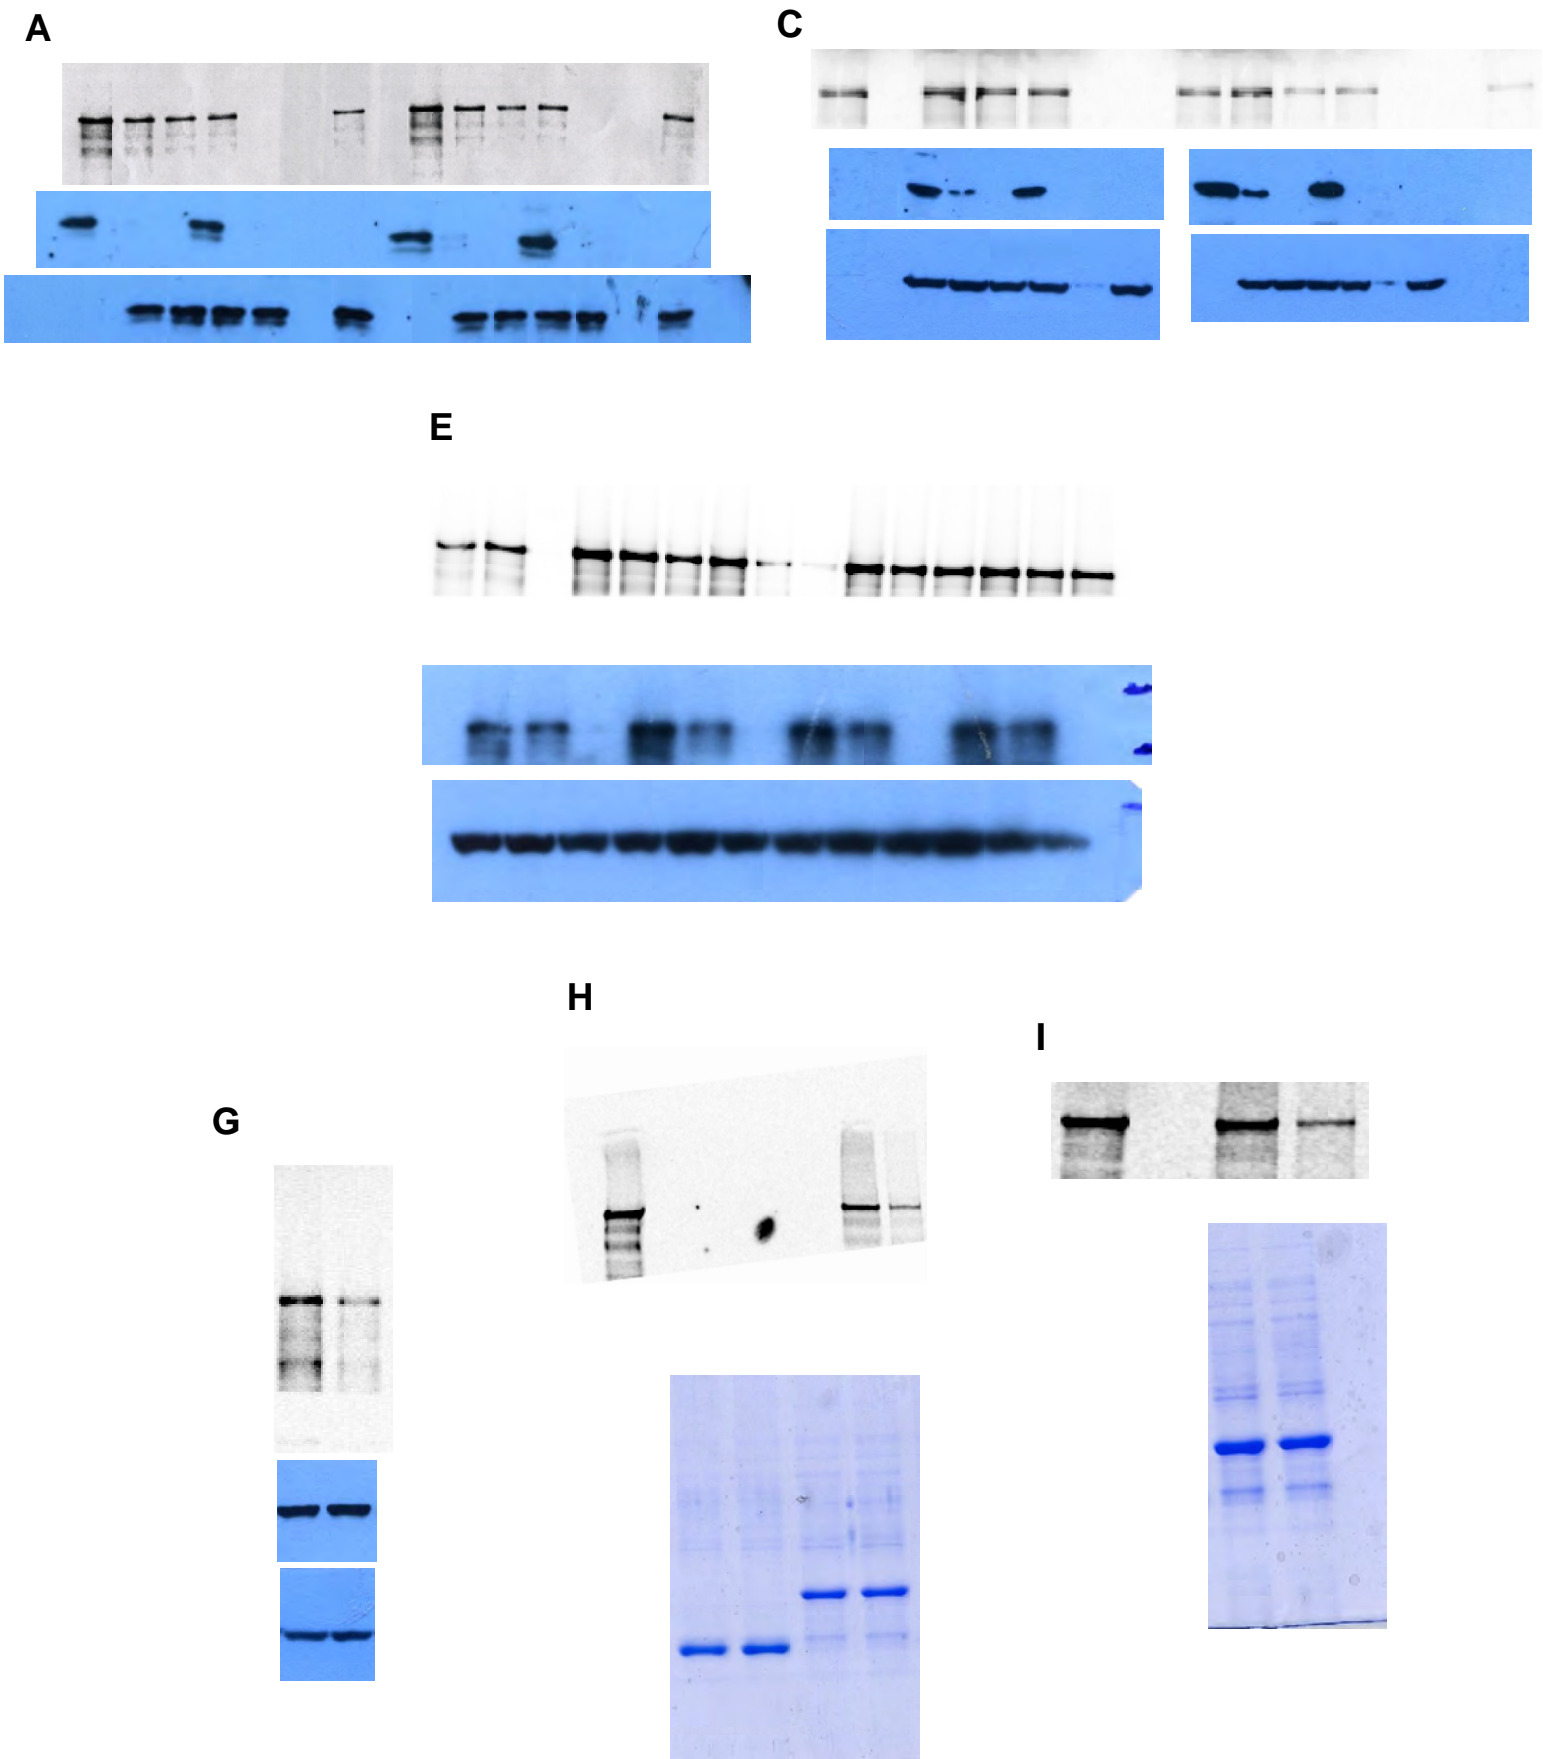

Figure 4

A

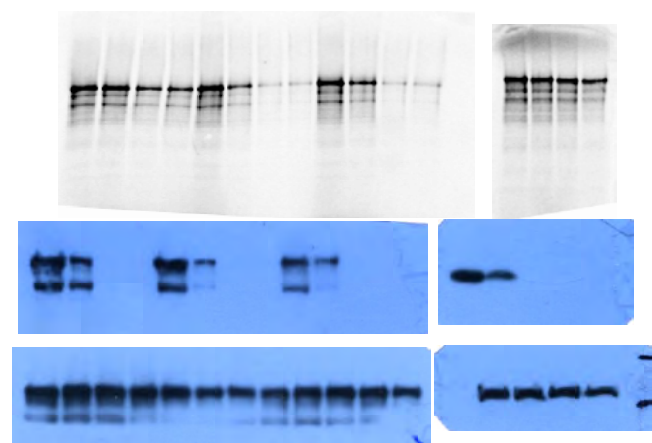

C

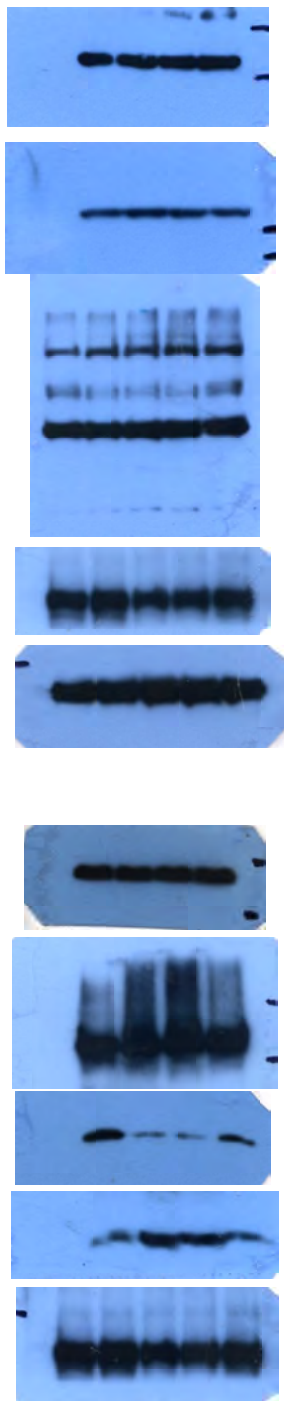

D

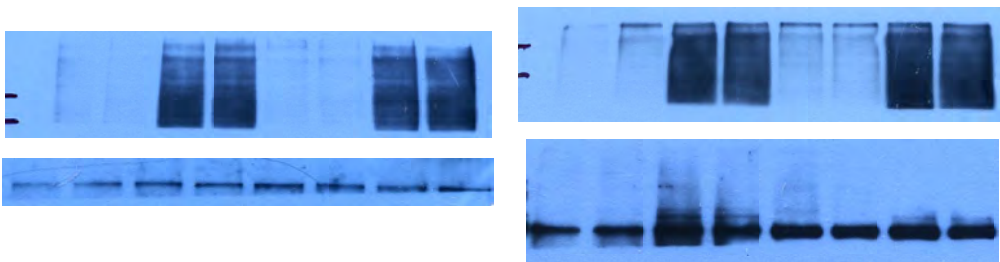

E

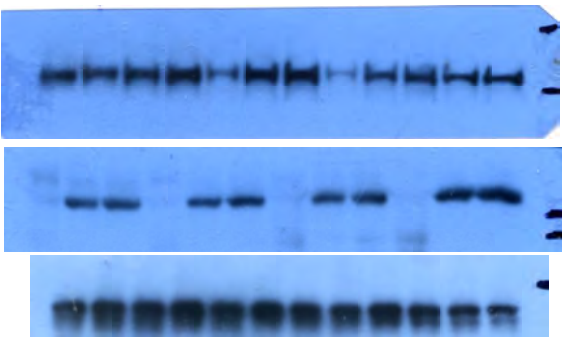

F

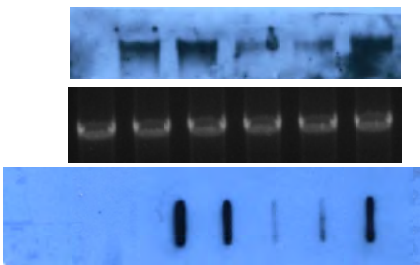



Figure 5

A

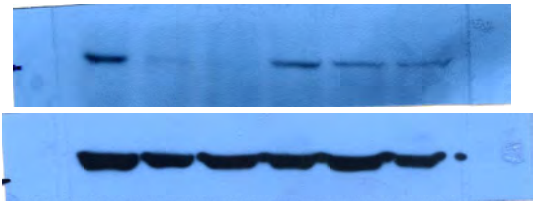

B

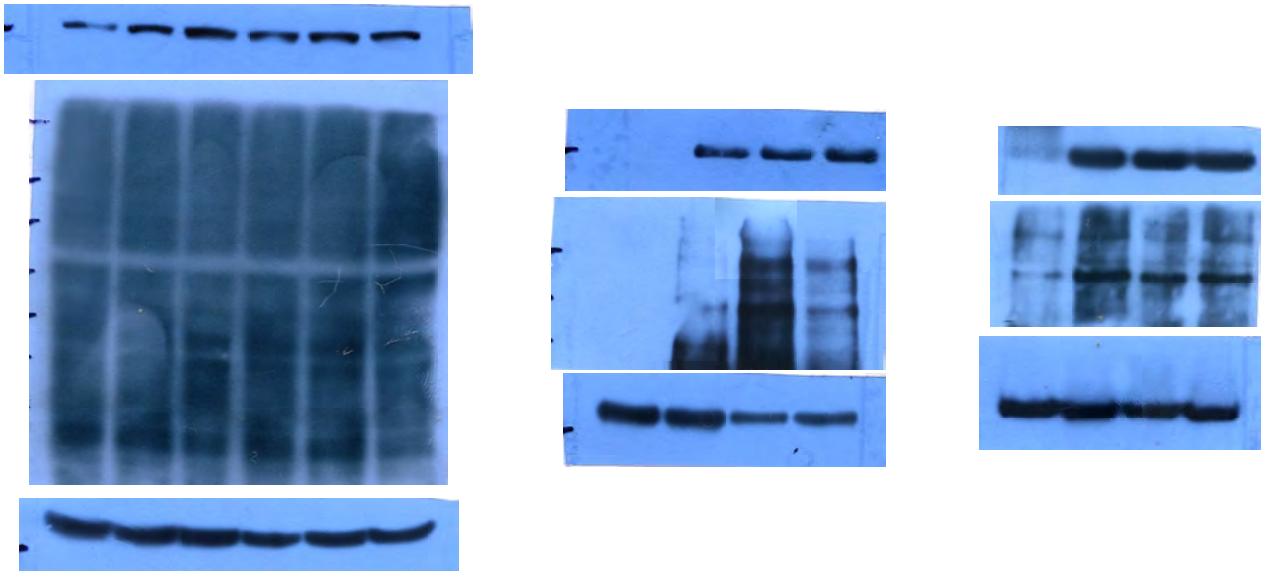

C

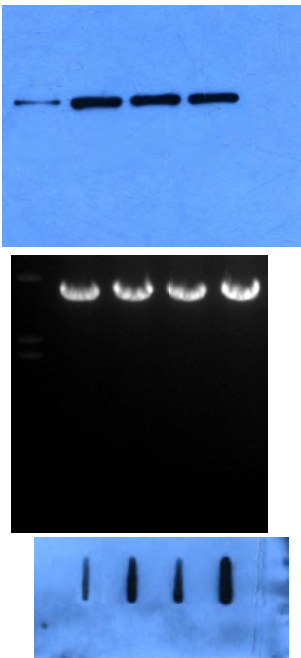

Figure 6

A

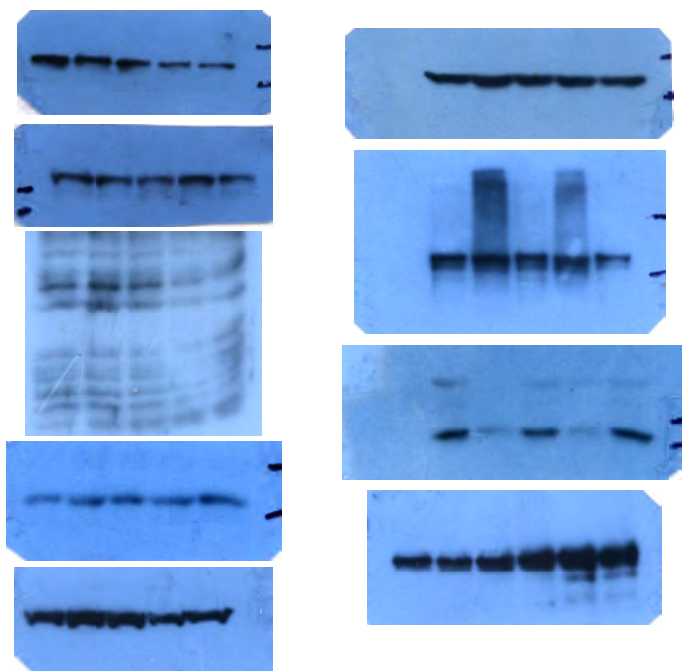

B

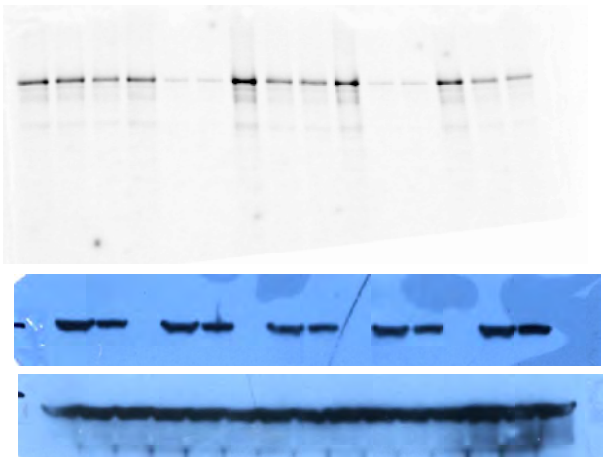

D

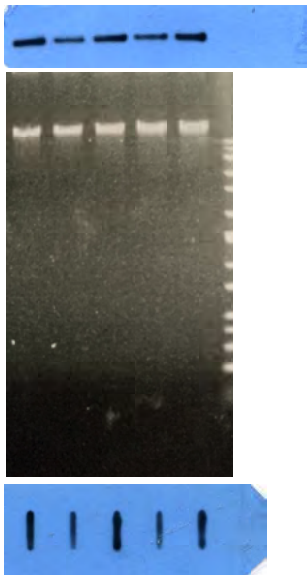

Figure S1

A

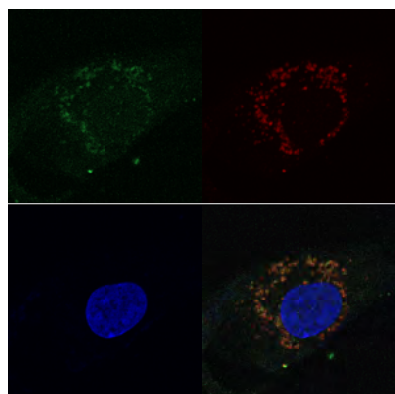

D

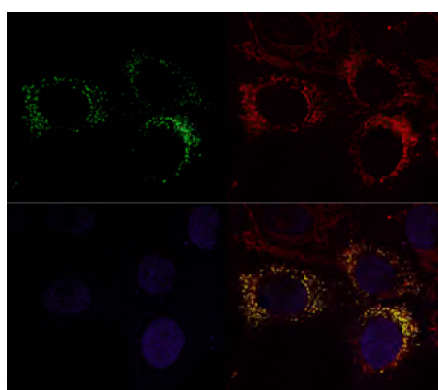

E

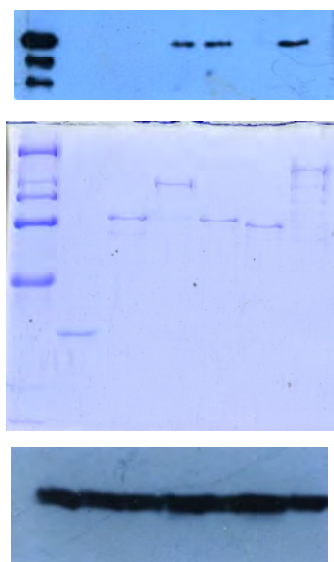

F

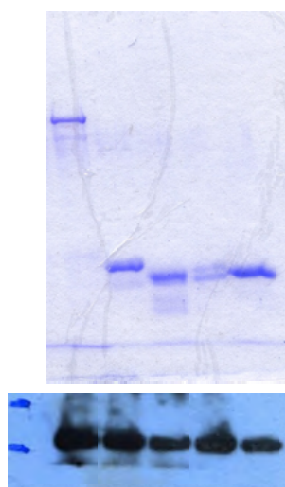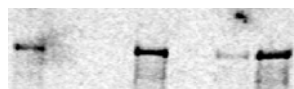

Figure S2

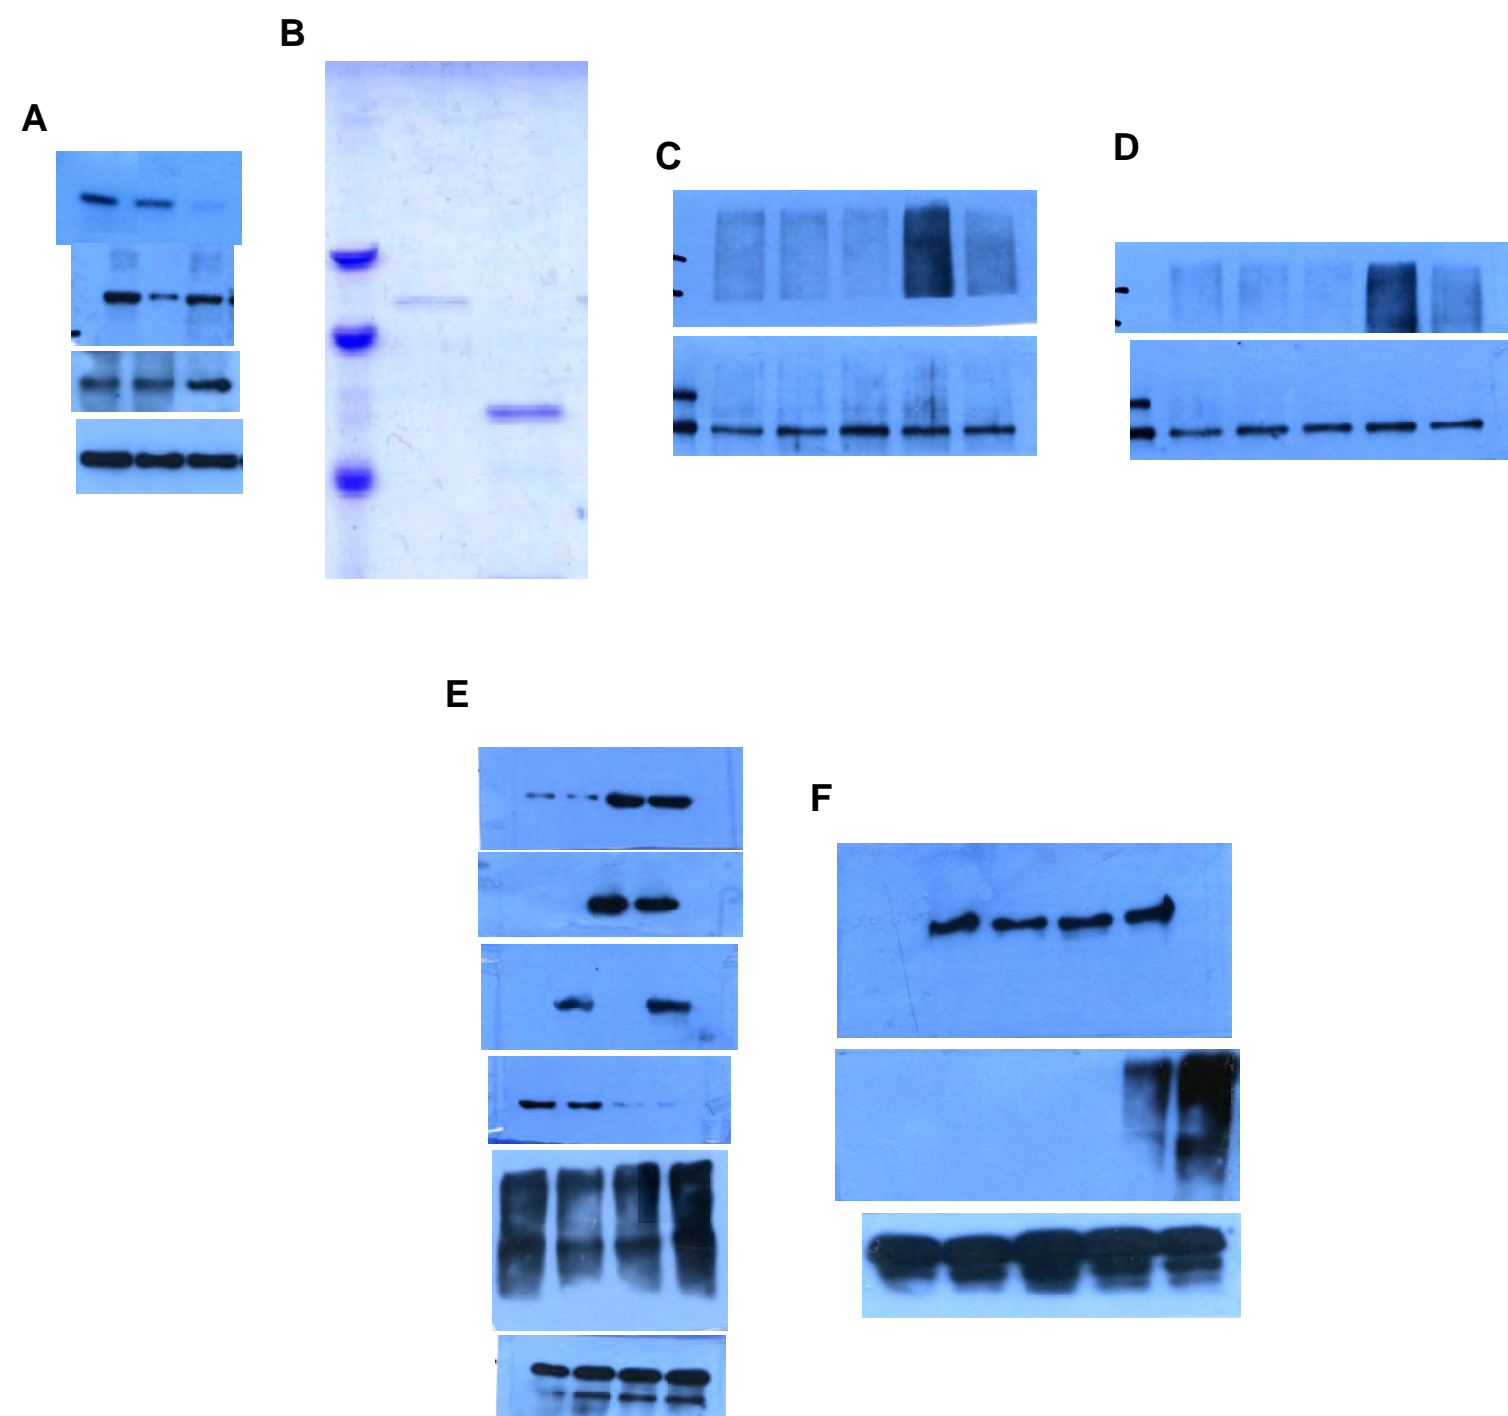



Figure S3

A

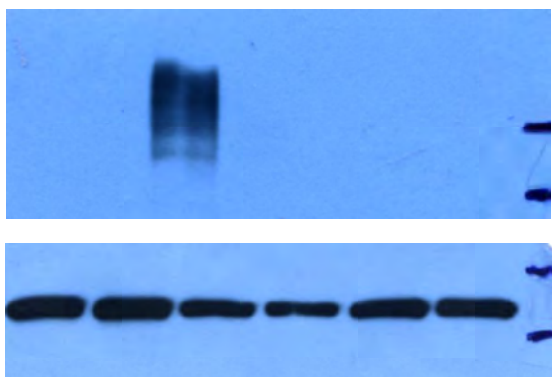

B

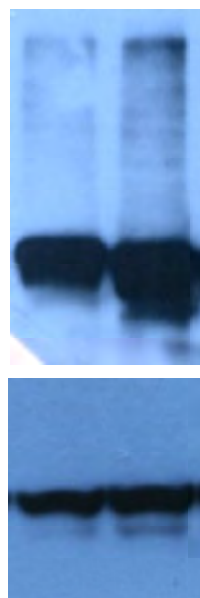

D

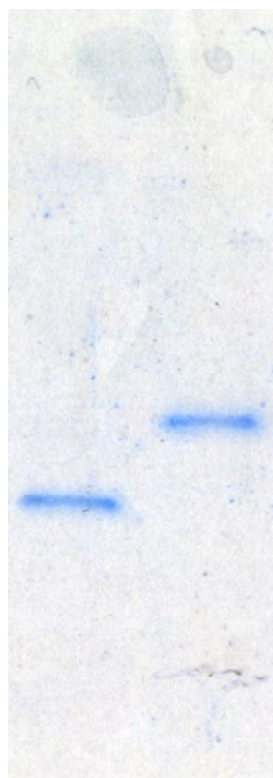

C

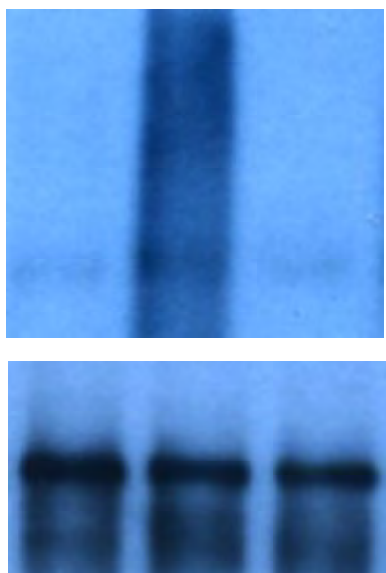

E

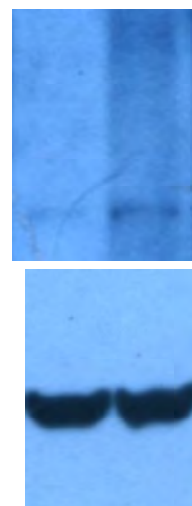

Figure S4

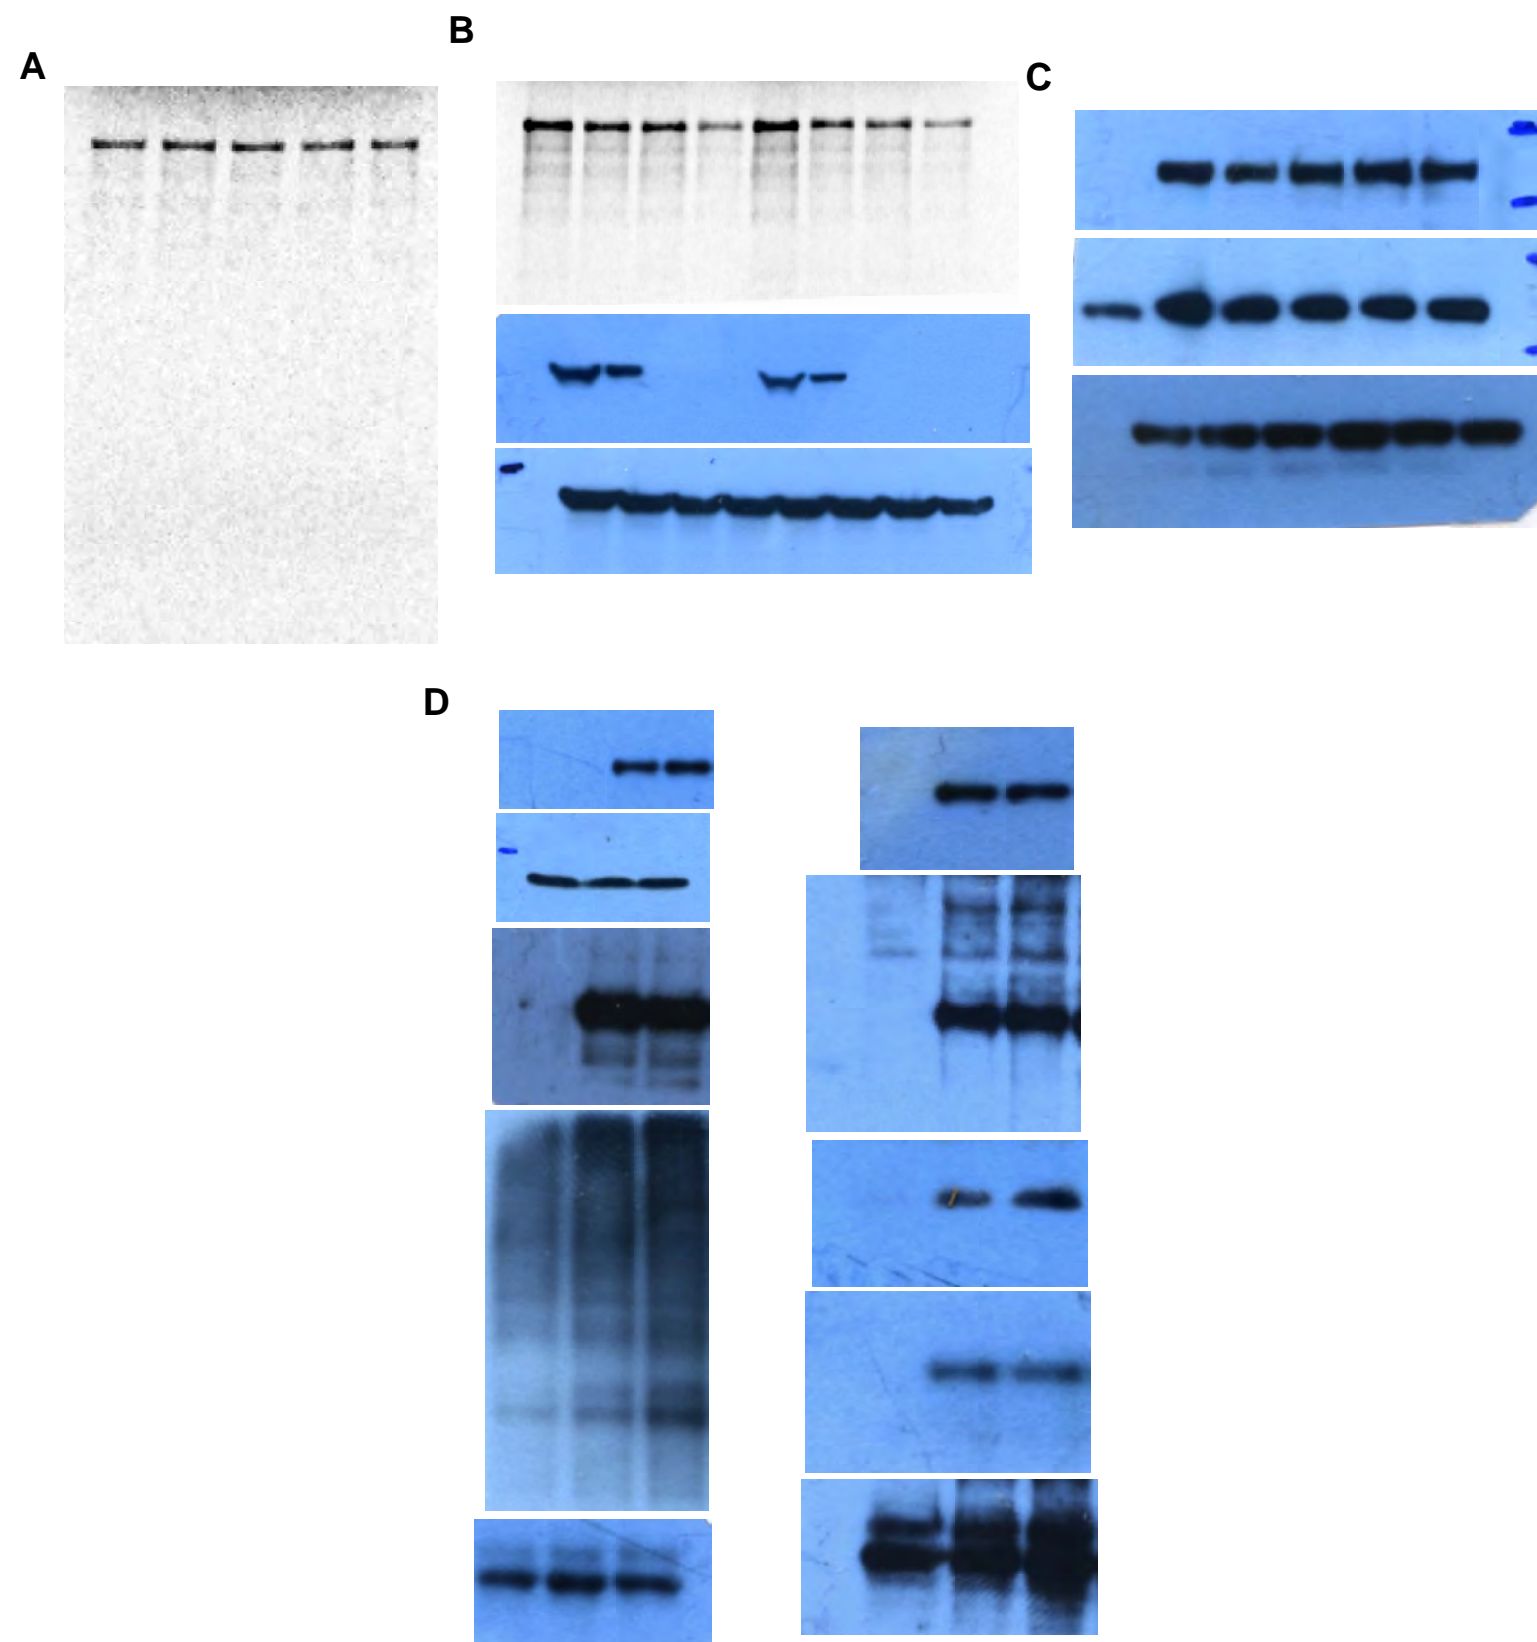

Figure S5

A

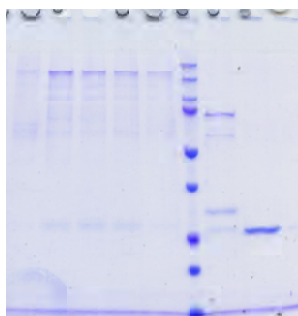

B

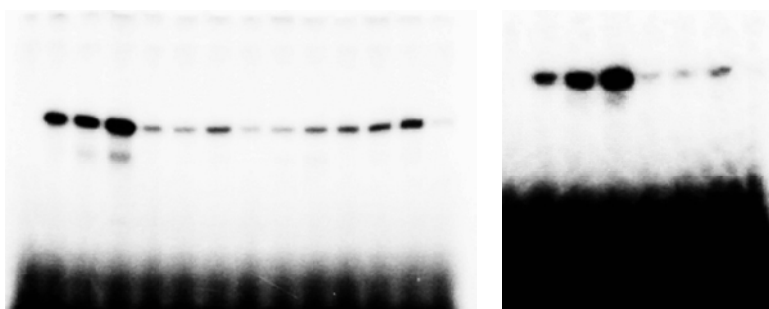

D

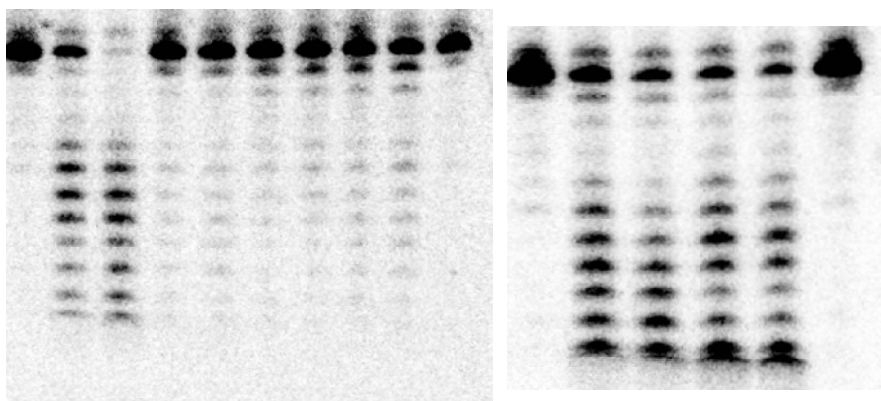

Figure S6

A

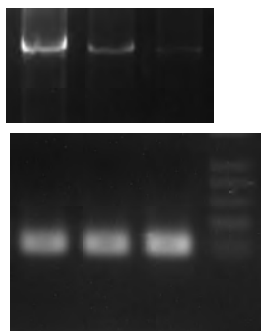

C

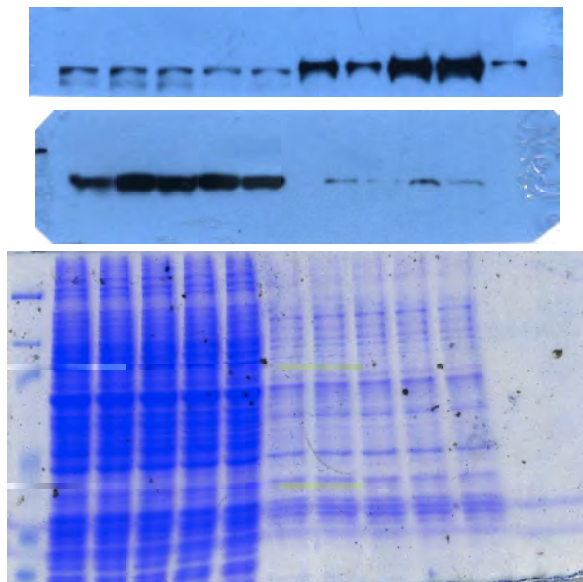

E

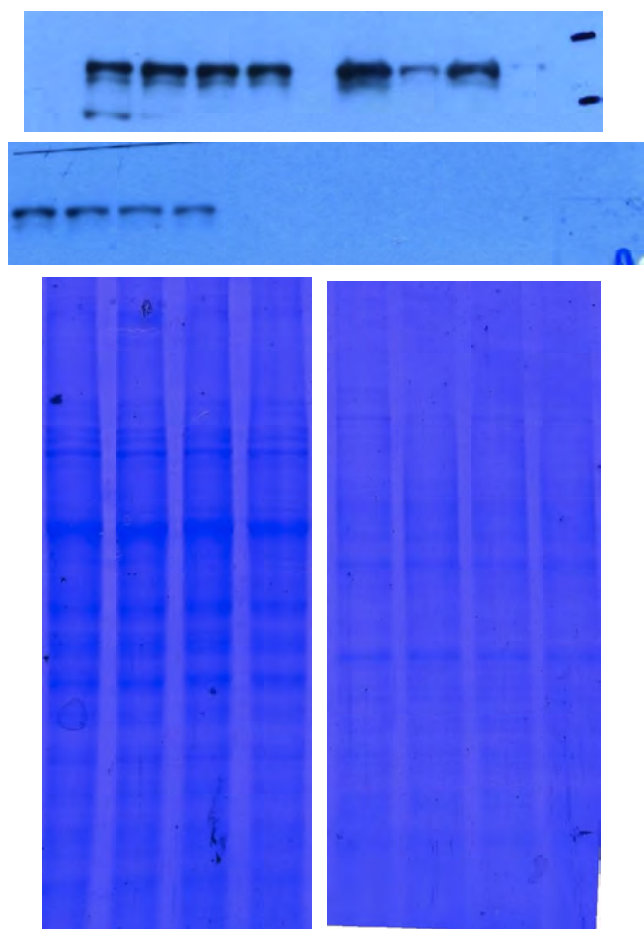

Supplement: S14 (10.1371/journal.pbio.3001139.s014) [file journal.pbio.3001139.s014]
